# Supplementary material for: Spray-Flame Synthesis of NASICON-Type Rhombohedral (α) Li1+xYxZr2−x(PO4)3 [x = 0–0.2] Solid Electrolytes
Source: MDPI journal article supplement (doi:10.3390/nano14151278), 2024-07-30
Supplement: s1 [file nanomaterials-3105180-supplementary.pdf › nanomaterials-3105180-supplementary.pdf]

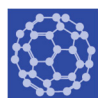

## Article

# Spray-Flame Synthesis of NASICON-Type Rhombohedral ( $\alpha$ ) $\text{Li}_{1+x}\text{Y}_x\text{Zr}_{2-x}(\text{PO}_4)_3$ [ $x = 0\text{--}0.2$ ] Solid Electrolytes

Md Yusuf Ali <sup>1,†</sup>, Tianyu Chen <sup>1,†</sup>, Hans Orthner <sup>1</sup> and Hartmut Wiggers <sup>1,2,\*</sup>

<sup>1</sup> Institute for Energy and Materials Processes—Reactive Fluids, University of Duisburg-Essen, 47057 Duisburg, Germany; yusuf.ali@uni-due.de (M.Y.A.); tianyu-chen@marubeni.com (T.C.); hans.orthner@uni-due.de (H.O.)

<sup>2</sup> CENIDE, Center for Nanointegration Duisburg-Essen, 47057 Duisburg, Germany

\* Correspondence: hartmut.wiggers@uni-due.de

<sup>†</sup> These authors contributed equally to this work.

**Citation:** Ali, M.Y.; Chen, T.; Orthner, H.; Wiggers, H. Spray-Flame Synthesis of NASICON-Type Rhombohedral ( $\alpha$ )  $\text{Li}_{1+x}\text{Y}_x\text{Zr}_{2-x}(\text{PO}_4)_3$  [ $x = 0\text{--}0.2$ ] Solid Electrolytes. *Nanomaterials* **2024**, *14*, x. <https://doi.org/10.3390/xxxxx>

Academic Editor: Jun-ho Yum

Received: 28 June 2024

Revised: 18 July 2024

Accepted: 24 July 2024

Published: 30 July 2024

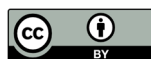

**Copyright:** © 2024 by the authors. Licensee MDPI, Basel, Switzerland. This article is an open access article distributed under the terms and conditions of the Creative Commons Attribution (CC BY) license (<https://creativecommons.org/licenses/by/4.0/>).

**Table S1.** Physical properties of solvents and precursors

| Chemical Formula                                                        | Category | Melting point [°C] | Boiling point [°C] |
|-------------------------------------------------------------------------|----------|--------------------|--------------------|
| LiNO <sub>3</sub>                                                       | Solute   | 255                | 600                |
| Y(NO <sub>3</sub> ) <sub>3</sub> ·6H <sub>2</sub> O                     | Solute   | 52                 | Decomposes at 640  |
| Zr(NO <sub>3</sub> ) <sub>4</sub> (ZN)                                  | Solute   | /                  | Decomposes at 100  |
| Zr <sup>x+</sup> ·xH <sub>3</sub> CCOOH (ZA)                            | Solute   | /                  | /                  |
| Zr(OCH <sub>2</sub> CH <sub>2</sub> CH <sub>3</sub> ) <sub>4</sub> (ZP) | Solute   | 661                | /                  |
| 2-Propanol                                                              | Solvent  | /                  | 82                 |
| Propionic acid                                                          | Solvent  | /                  | 141                |
| Ethanol                                                                 | Solvent  | /                  | 78                 |
| 2-Ethylhexanoic acid                                                    | Solvent  | /                  | 217                |
| Acetic acid                                                             | Solvent  | /                  | 118                |

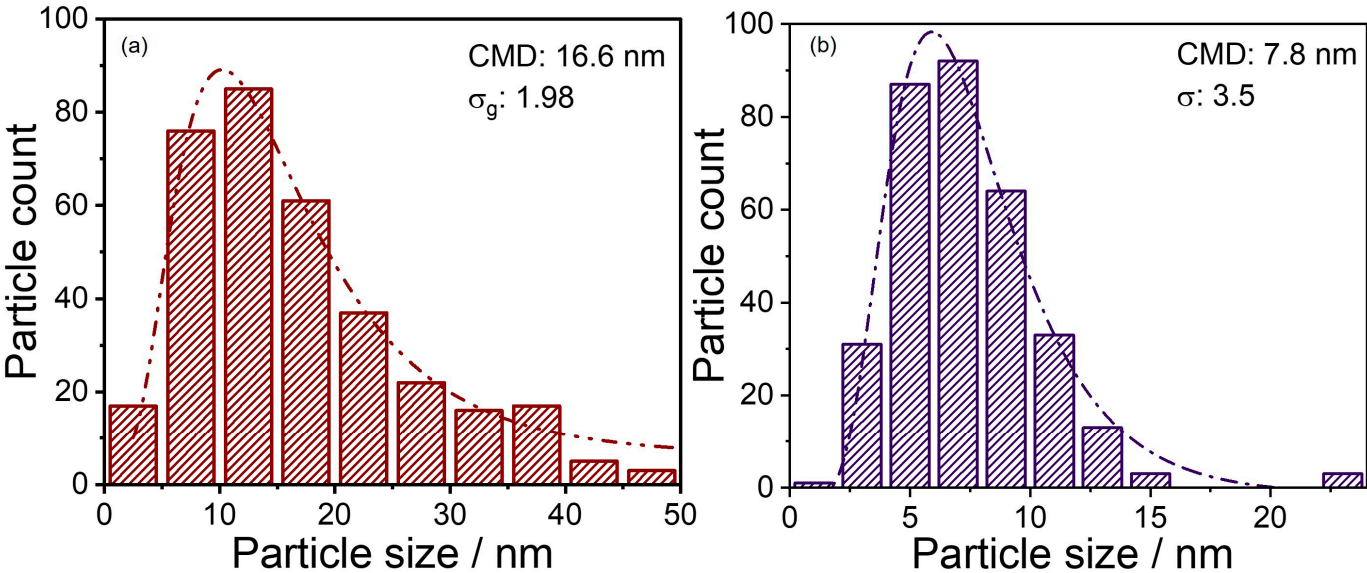

**Figure S1.** Particle size distribution of as-synthesized particles from case (LY<sub>0.2</sub>ZP)<sub>PA50</sub> (a) and (LY<sub>0.2</sub>ZP)<sub>EA50</sub> (b) respectively.

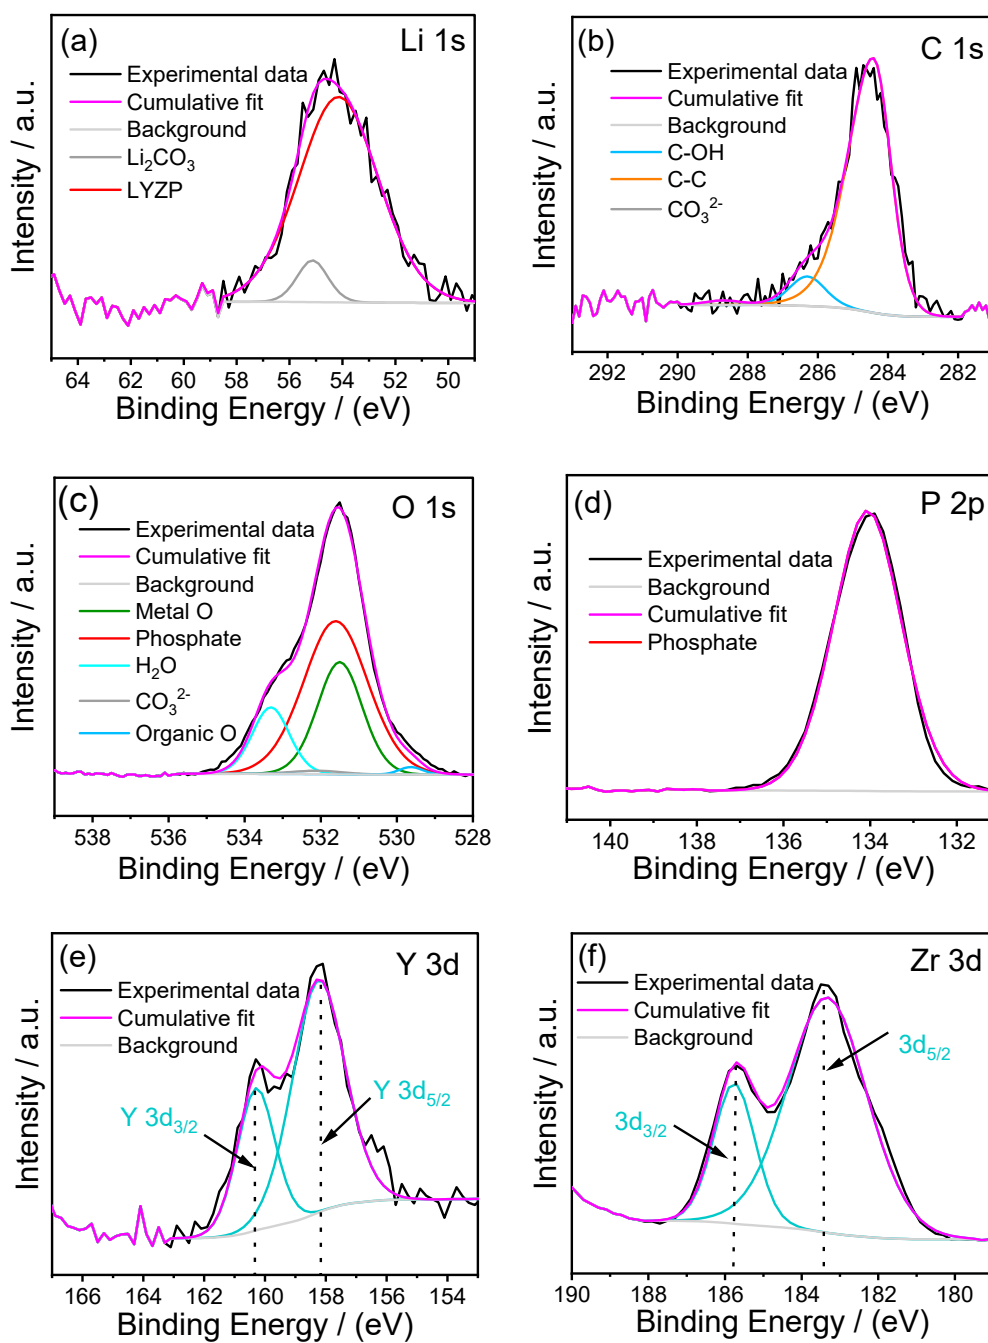

**Figure S2.** Results of XPS measurements of (a) Li 1s. (b) C 1s. (c) O 1s. (d) P 2p. (e) Y 3d. (f) Zr 3d of as-synthesized (LY<sub>0.2</sub>ZP)<sub>PA50</sub>

62

63

64

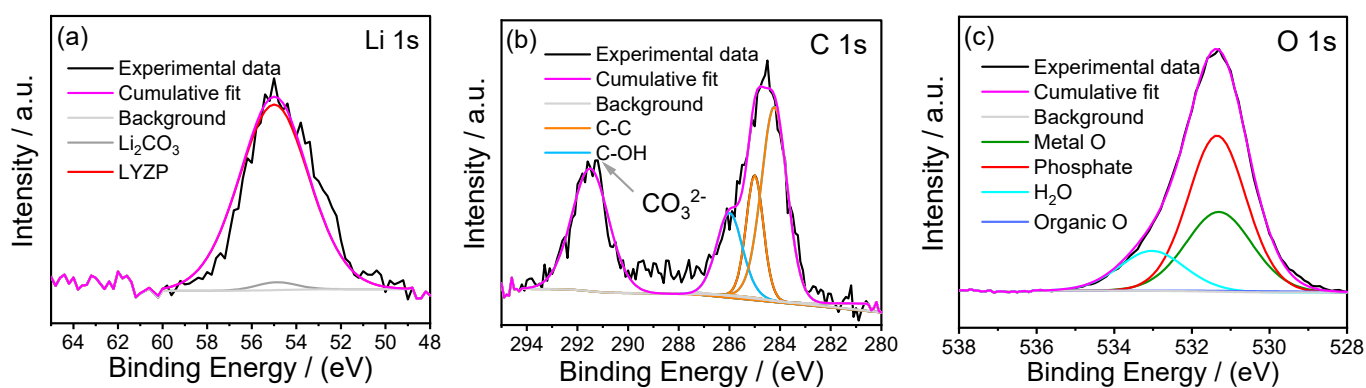

**Figure S3.** Results of XPS measurements of (a) Li 1s. (b) C 1s. (c) O 1s of as-synthesized  $(LY_{0.2}ZP)_{EA50}$ .

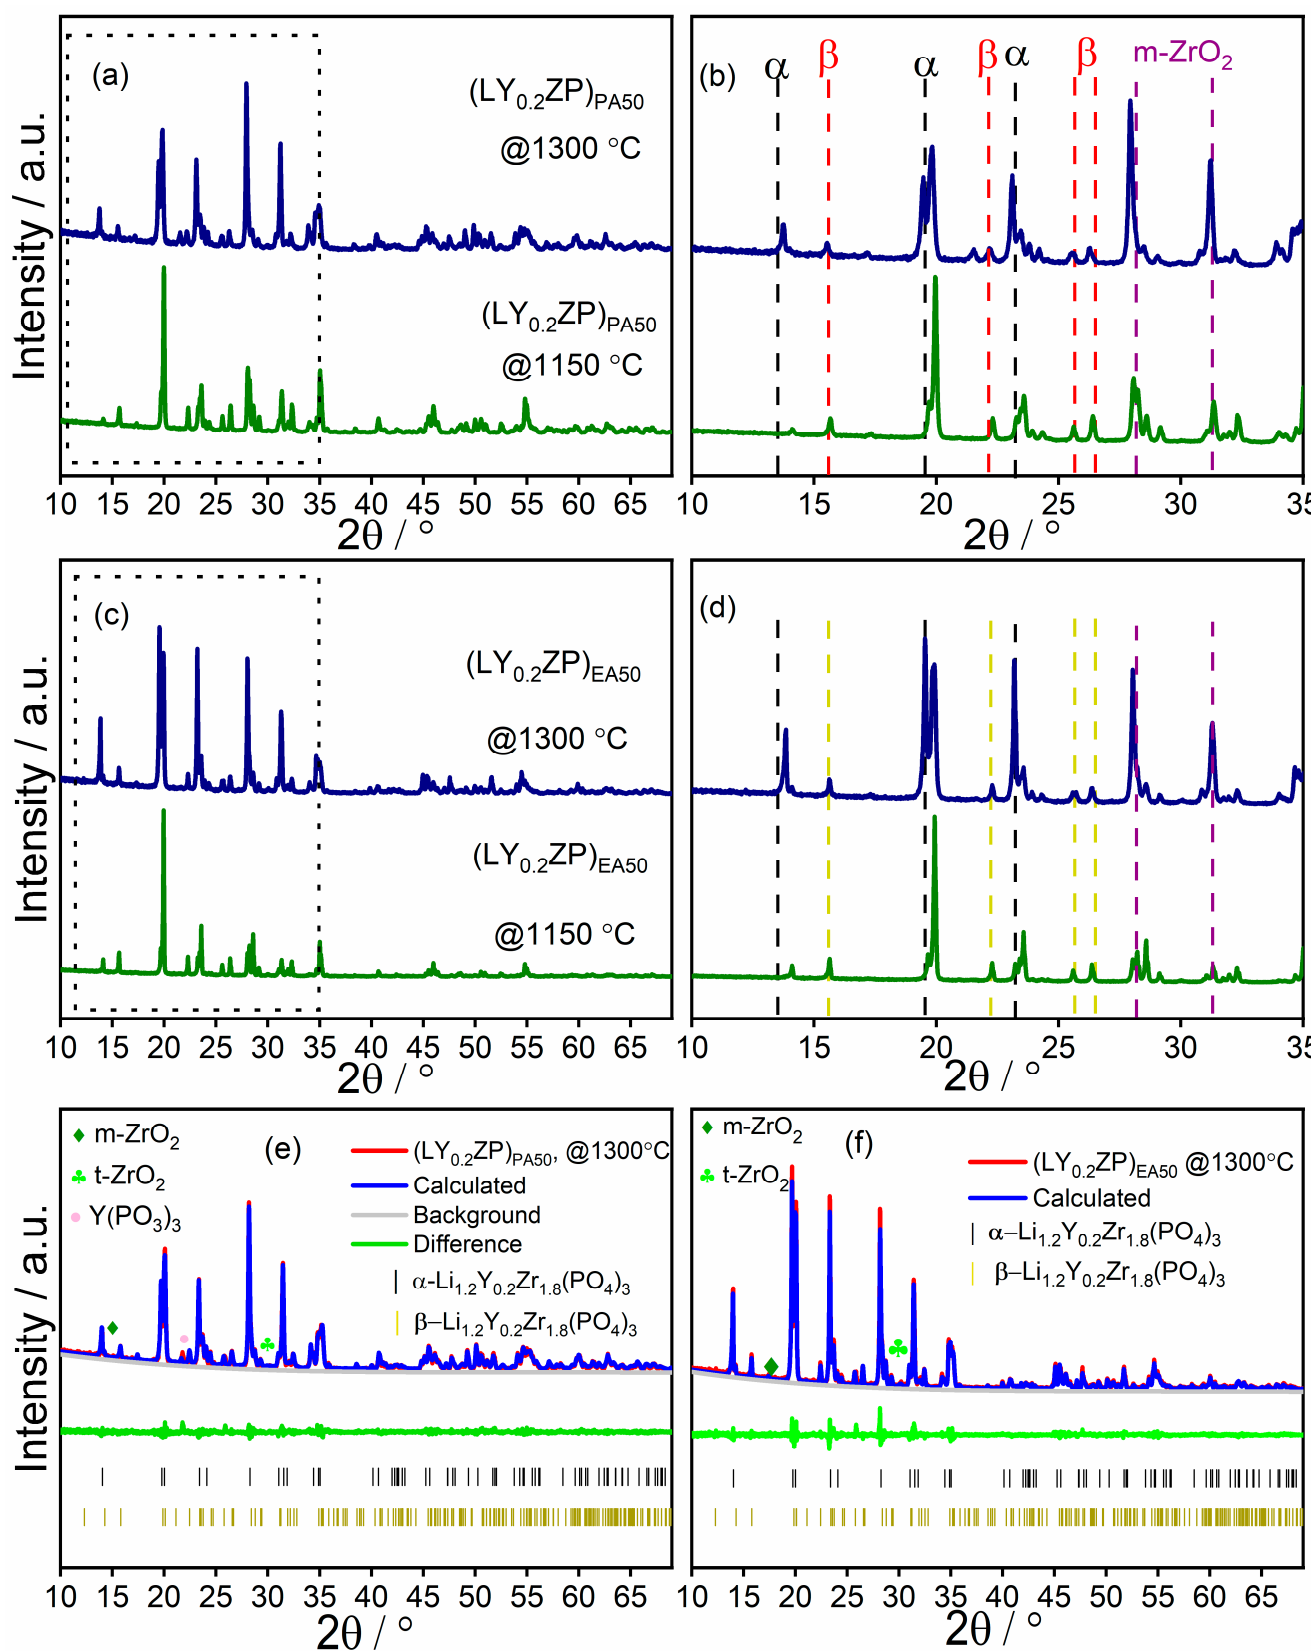

**Figure S4.** (a), (c) XRD patterns comparison before and after annealing at 1150 & 1300 °C of  $(LY_{0.2}ZP)_{PA}$  and  $(LY_{0.2}ZP)_{EA}$  respectively, for 1 h under O<sub>2</sub>. (b), (d) corresponding detailed illustration in the range of 10° to 35°  $2\theta$ ,  $\alpha$  refers to rhombohedral phase  $Li_{1+x}Y_xZr_{2-x}(PO_4)_3$  and  $\beta$  refers to orthorhombic phase  $Li_{1+x}Y_xZr_{2-x}(PO_4)_3$ . (e), (f) phase composition of material from  $(LY_{0.2}ZP)_{PA}$  and  $(LY_{0.2}ZP)_{EA}$  respectively using Rietveld refinement after annealing at 1300 °C for 1 h under O<sub>2</sub>.

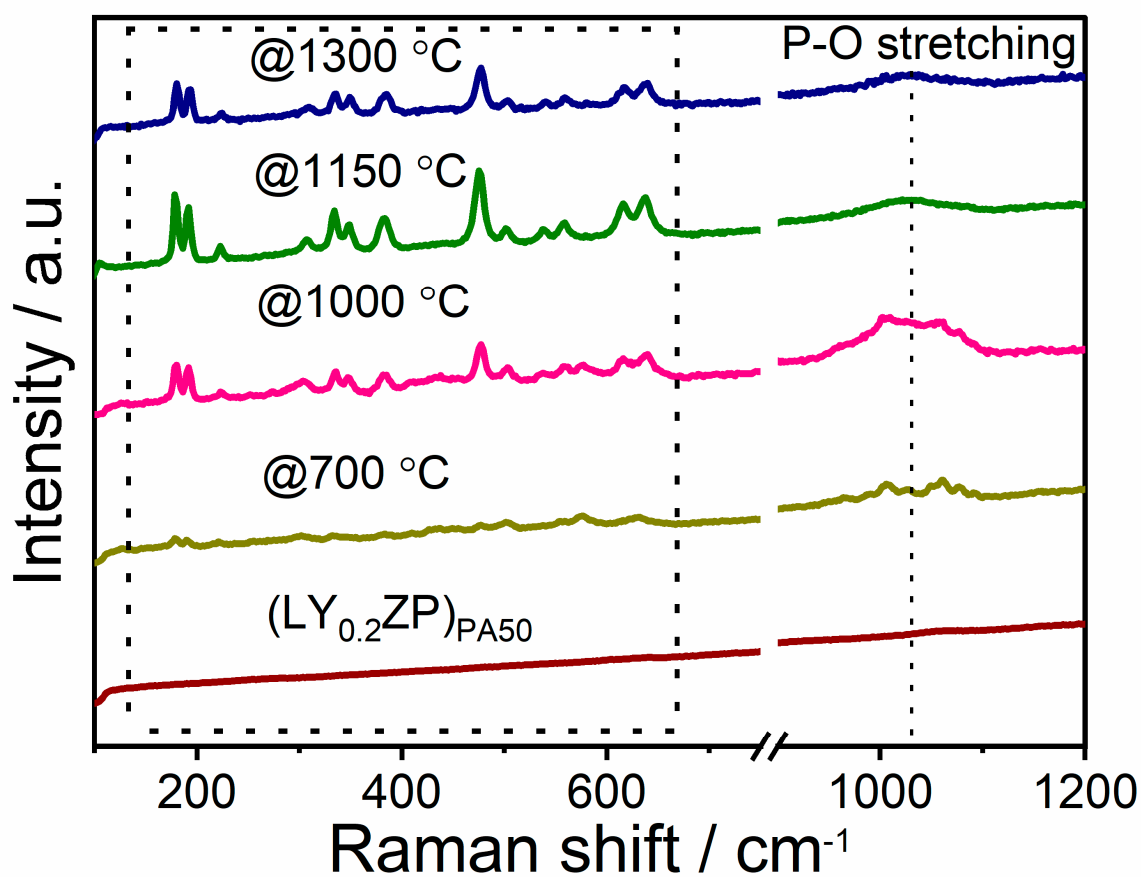

**Figure S5.** Raman spectroscopy of materials from  $(LY_{0.2}ZP)_{PA50}$  after sintering at different temperature conditions for 1 h under O<sub>2</sub>. All absorptions bands in dotted rectangular indicates the presence of m-ZrO<sub>2</sub>, while the dotted line is attributed to P-O stretching.

74  
75  
76  
77

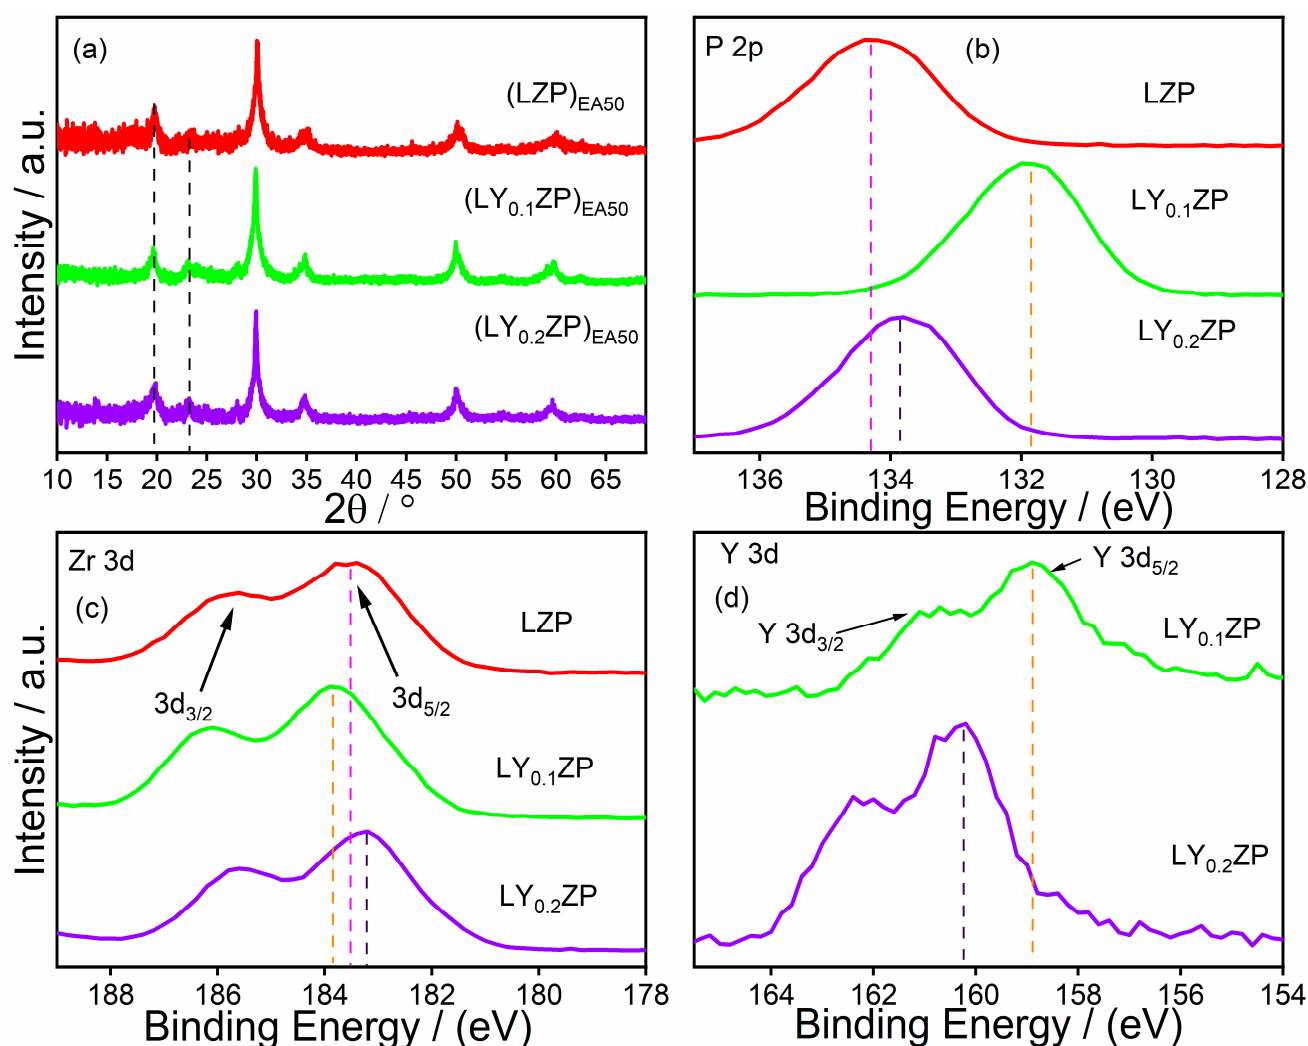

**Figure S6.** (a) Compositions of as-synthesized materials from experiments involving solvent mixture ethanol/2-EHA (1:1 by volume). Point-point-dash lines refer to new present peaks compared to the compositions of as-synthesized particles from case (LY0.2ZP)<sub>PA50</sub>. XPS results from (b) P 2p. (c) Zr 3d. (d) Y 3d from experiments involving solvent mixture 'B' with varying Y<sup>3+</sup> doping.

**Table S2.** Comparison of as-synthesized average particle size

| Nomenclature                           | As-synthesized average particle size [nm] |       |      |                                  |
|----------------------------------------|-------------------------------------------|-------|------|----------------------------------|
|                                        | Specific Surface area [m <sup>2</sup> /g] | BET   | TEM  | Refinement (m-ZrO <sub>2</sub> ) |
| (LY <sub>0.2</sub> ZP) <sub>PA50</sub> | 5.7                                       | 180.6 | 25.7 | 27.2 ± 0.8                       |
| (LY <sub>0.2</sub> ZP) <sub>EA50</sub> | 122.1                                     | 8.9   | 7.8  | 3.6 ± 0.7                        |
| (LY <sub>0.1</sub> ZP) <sub>EA50</sub> | 129.0                                     | 8.4   | 7.8  | 14.8 ± 0.4                       |
| (LZP) <sub>EA50</sub>                  | 116.7                                     | 9.3   | 9.1  | 9.6 ± 5.5                        |

78

79

80

81

82

83

84

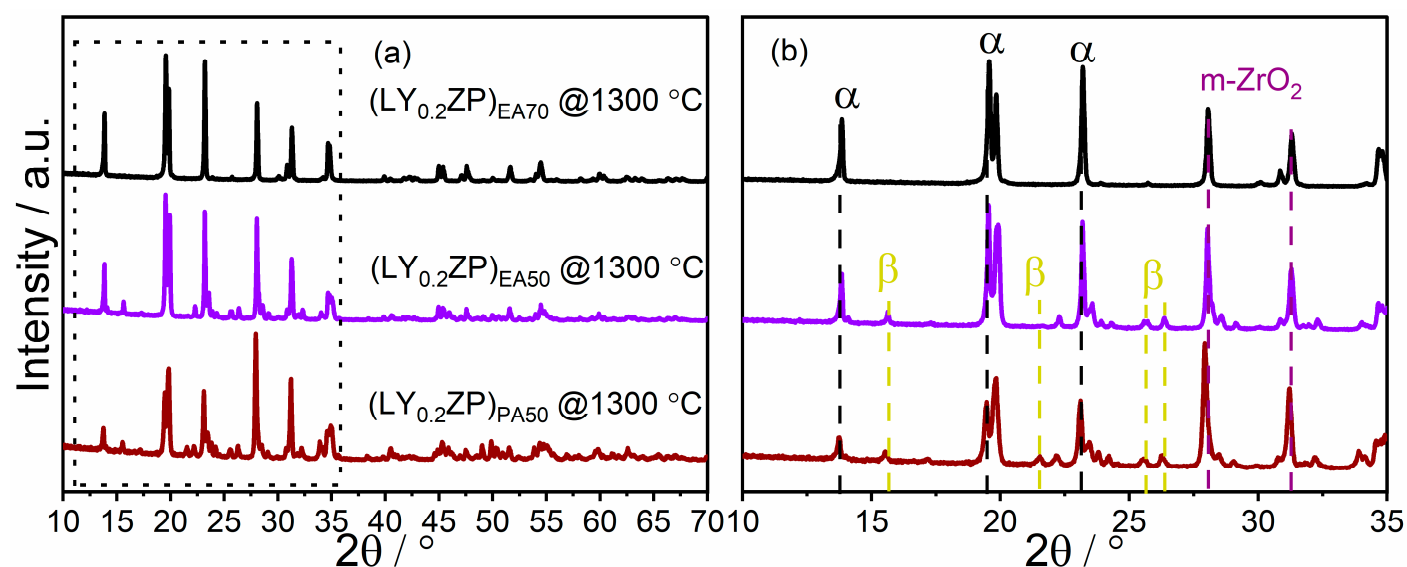

**Figure S7.** (a) XRD patterns of materials from  $(LY_{0.2}ZP)_{PA50}$ ,  $(LY_{0.2}ZP)_{EA50}$  and  $(LY_{0.2}ZP)_{EA70}$  (from bottom to top) after annealing at different temperature conditions for 1h under  $O_2$ . (b) corresponding detailed illustration in the range of 10° to 35°  $2\theta$ .  $\alpha$  and  $\beta$  refers to rhombohedral phase and orthorhombic phase of  $Li_{1+x}Y_xZr_{2-x}(PO_4)_3$  respectively.

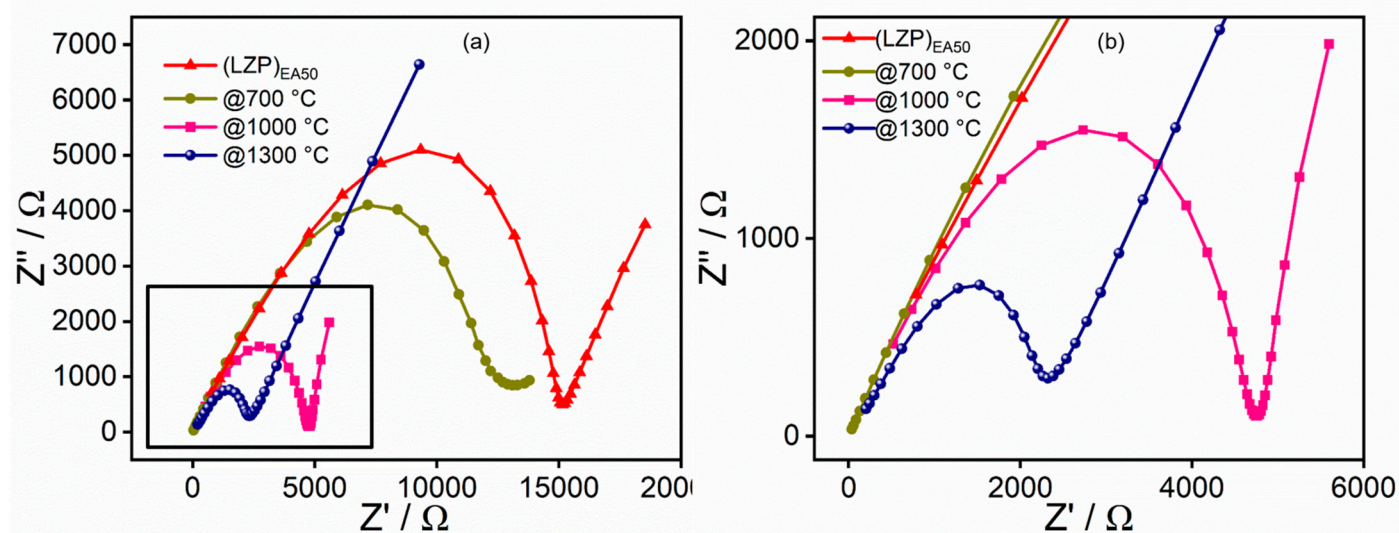

**Figure S8.** Impedance spectra of  $(LZP)_{EA50}$  particles after annealing at different temperatures (a). And (b) represents the zoomed image of the square in (a).



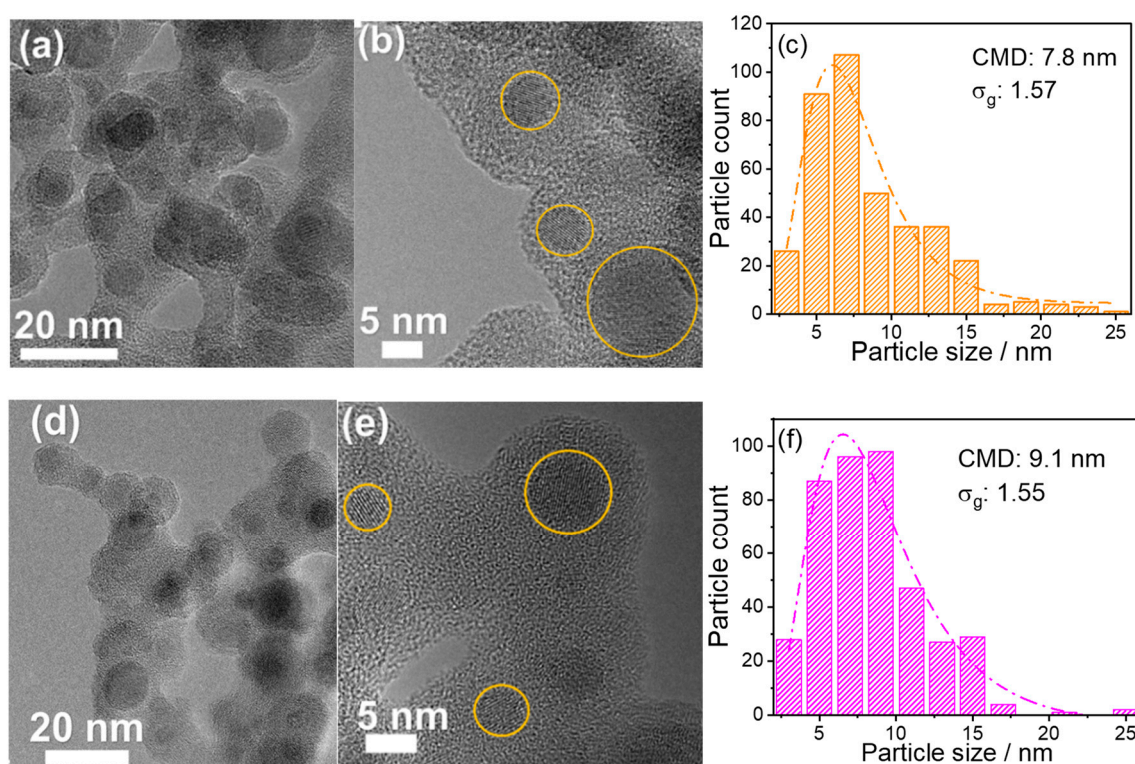

**Figure S9.** (a) TEM (b) HRTEM of particles from (LY<sub>0.1</sub>ZP)<sub>EA50</sub> (c) corresponding particle size distribution and fitted lognormal curve. (d) TEM (e) HRTEM of particles from (LZP)<sub>EA50</sub> (f) corresponding particle size distribution and fitted lognormal curve.

94

95

96

97

98
